# Supplementary material
Source: Springer Nature journal article supplement (https://www.springermedizin.de/resource/supplementary/12936_2006_281_MOESM4_ESM.pdf/9547088)

7Qs

7b

15Qs

15b

M

17Qu

17b

28Qs

28b

U

63bp

326bp

189bp

137bp

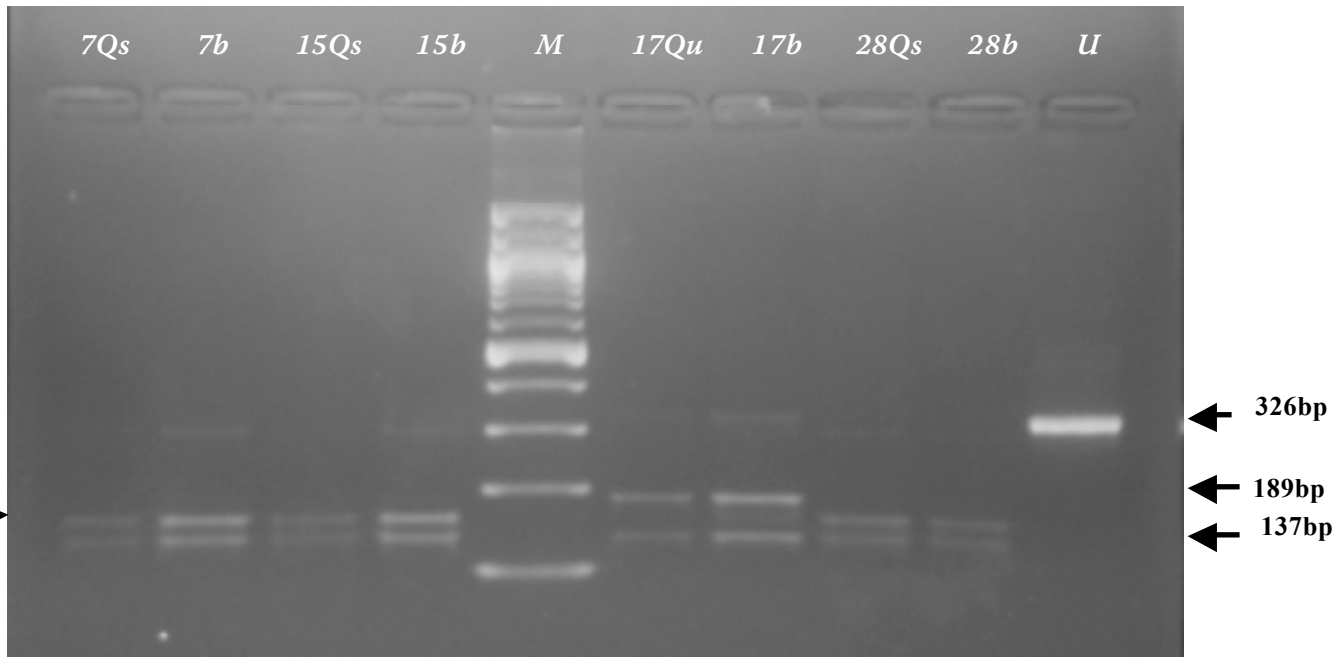

Supplement: MOESM4 [file 9547088]
